# Supplementary material for: Circulating plasma exosomal miRNA profiles serve as potential metastasis-related biomarkers for hepatocellular carcinoma
Source: PubMed Central journal article supplement — Oncol Lett. 2021 Jan 4;21(2):168. doi: 10.3892/ol.2021.12429 (PMC7798106; doi:10.3892/ol.2021.12429), 2021-01-04
Supplement: Supplementary_Data.pdf [file Supplementary_Data.pdf]

Figure S1. Residual analysis of correlation analysis of the expression levels of selected miRNAs from the plasma exosomes and corresponding tissue samples from the same patients with lung-metastatic hepatocellular carcinoma. miRNA/miR, microRNA.

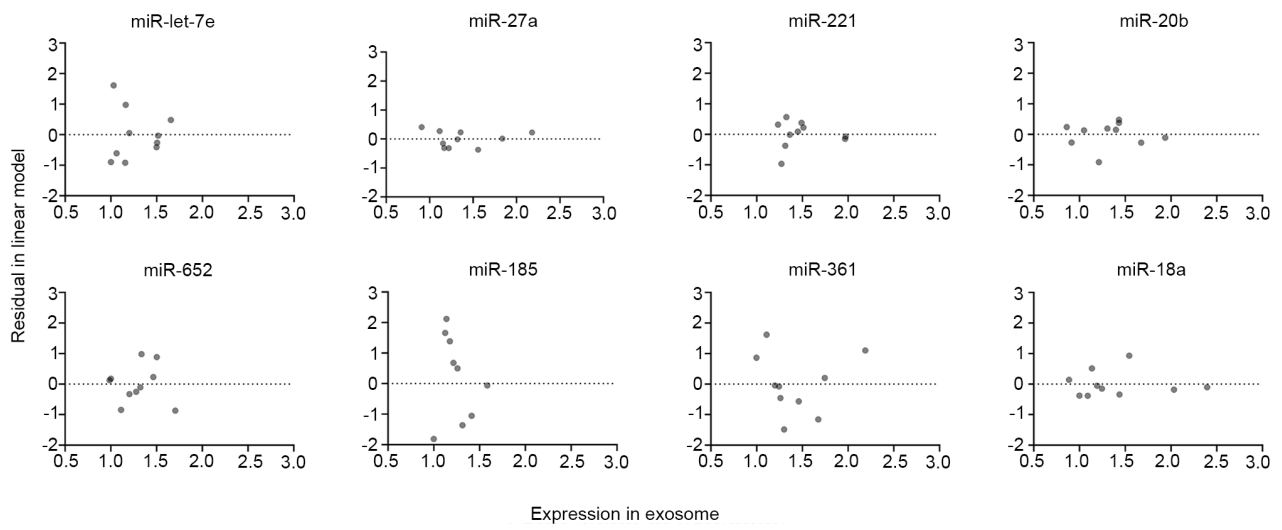

Figure S2. Spline curves of correlation analysis of the expression levels of selected miRNAs from the plasma exosomes and corresponding tissue samples from the same patients with lung-metastatic hepatocellular carcinoma. miRNA/miR, microRNA.

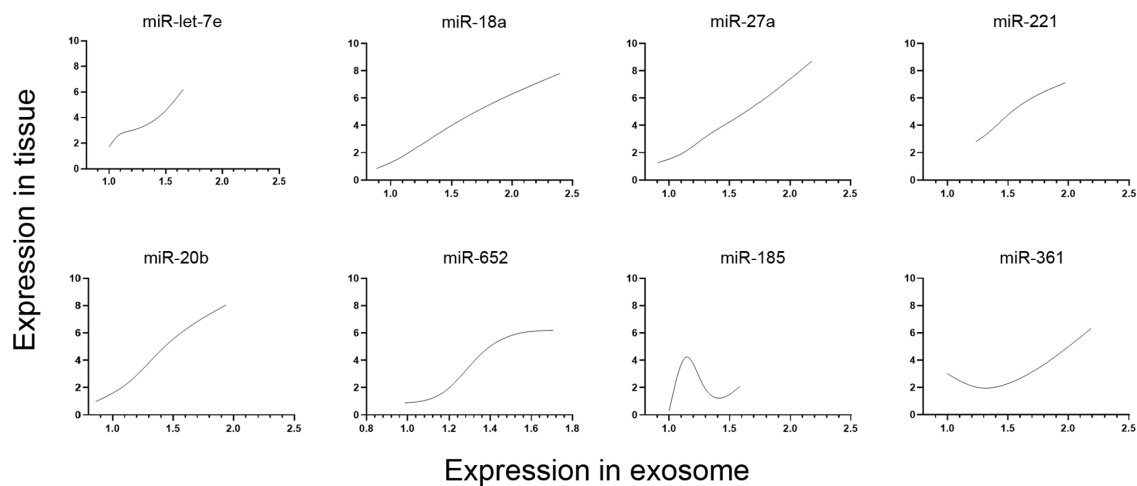

Table SI. AUC comparison of different predictor combinations performed by Delong's test.

| Model comparison            |                  |                                                 |                  |         |
|-----------------------------|------------------|-------------------------------------------------|------------------|---------|
| Predictor                   | AUC (95% CI)     | vs.                                             | AUC (95%CI)      | P-value |
| All predictors              | 0.91 (0.87-0.95) | let-7e                                          | 0.61 (0.52-0.69) | <0.001  |
|                             |                  | miR-18a                                         | 0.77 (0.70-0.84) | <0.001  |
|                             |                  | miR-20b                                         | 0.86 (0.81-0.91) | 0.012   |
|                             |                  | miR-221                                         | 0.58 (0.49-0.66) | <0.001  |
|                             |                  | miR-27a                                         | 0.82 (0.76-0.88) | <0.001  |
|                             |                  | miR-652                                         | 0.61 (0.52-0.69) | <0.001  |
| miR-18a + miR-20b + miR-27a | 0.87 (0.82-0.92) | miR-18a + miR-20b + miR-27a                     | 0.87 (0.82-0.92) | 0.011   |
|                             |                  | miR-18a + miR-20b+ miR-27a + let-7e             | 0.87 (0.83-0.92) | 0.149   |
|                             |                  | miR-18a + miR-20b+ miR-27a + miR-221            | 0.91 (0.87-0.95) | 0.014   |
|                             |                  | miR-18a + miR-20b + miR-27a + miR-652           | 0.88 (0.83-0.93) | 0.343   |
|                             |                  | miR-18a + miR-20b + miR-27a + let-7e + miR-221  | 0.91 (0.87-0.95) | 0.011   |
|                             |                  | miR-18a + miR-20b + miR-27a + miR-221 + miR-652 | 0.91 (0.87-0.95) | 0.016   |
|                             |                  | miR-18a + miR-20b + miR-27a + let-7e + miR-652  | 0.88 (0.83-0.93) | 0.249   |
|                             |                  | miR-18a + miR-20b + miR-27a+ miR-221            | 0.91 (0.87-0.95) | 0.050   |
|                             |                  | miR-18a + miR-20b + miR-27a + let-7e + miR-652  | 0.91 (0.87-0.95) | 0.050   |
|                             |                  | miR-221                                         |                  |         |
| miR-18a + miR-20b + miR-27a | 0.87 (0.82-0.92) | miR-18a + miR-20b + miR-221                     | 0.90 (0.86-0.94) | 0.048   |
|                             |                  | miR-18a + miR-221 + miR-27a                     | 0.87 (0.82-0.92) | 0.992   |
|                             |                  | miR-221 + miR-20b + miR-27a                     | 0.90 (0.86-0.94) | 0.155   |
| miR-18a + miR-20b + miR-221 | 0.90 (0.86-0.94) | miR-221 + miR-20b + miR-27a                     | 0.90 (0.86-0.94) | 0.878   |
|                             |                  | miR-18a + miR-20b + miR-27a + miR-221           | 0.91 (0.87-0.95) | 0.336   |
|                             |                  | All predictors                                  | 0.91 (0.87-0.95) | 0.292   |
|                             |                  | miR-20b                                         | 0.86 (0.81-0.91) | 0.019   |

95% CI, 95% confidence interval; AUC, area under the curve; miR, microRNA.

Table SII. Functional annotation of the GO and the KEGG pathway analysis of the upregulated exosomal microRNAs.

| Category     | Term                                                                                                                       | EnrichScore | P-value                  |
|--------------|----------------------------------------------------------------------------------------------------------------------------|-------------|--------------------------|
| GO_BP        | GO:0007179~transforming growth factor beta receptor signaling pathway                                                      | 1.866516323 | 5.98277x10 <sup>-7</sup> |
| GO_BP        | GO:0071453~cellular response to oxygen levels                                                                              | 1.857914865 | 3.42546x10 <sup>-8</sup> |
| GO_BP        | GO:0036294~cellular response to decreased oxygen levels                                                                    | 1.810799418 | 4.46878x10 <sup>-7</sup> |
| GO_BP        | GO:0071559~response to transforming growth factor beta                                                                     | 1.742081901 | 8.39457x10 <sup>-7</sup> |
| GO_BP        | GO:0016197~endosomal transport                                                                                             | 1.740683762 | 8.70854x10 <sup>-8</sup> |
| GO_BP        | GO:0070482~response to oxygen levels                                                                                       | 1.660243630 | 1.37732x10 <sup>-8</sup> |
| GO_BP        | GO:0043161~proteasome-mediated ubiquitin-dependent protein catabolic process                                               | 1.649479541 | 1.12543x10 <sup>-8</sup> |
| GO_BP        | GO:0010256~endomembrane system organization                                                                                | 1.626131645 | 2.32357x10 <sup>-8</sup> |
| GO_BP        | GO:0036293~response to decreased oxygen levels                                                                             | 1.620499845 | 1.97134x10 <sup>-7</sup> |
| GO_BP        | GO:0001666~response to hypoxia                                                                                             | 1.592833578 | 8.08599x10 <sup>-7</sup> |
| GO_BP        | GO:0001933~negative regulation of protein phosphorylation                                                                  | 1.584778010 | 5.66492x10 <sup>-8</sup> |
| GO_BP        | GO:0031331~positive regulation of cellular catabolic process                                                               | 1.583710821 | 1.61934x10 <sup>-7</sup> |
| GO_BP        | GO:0010498~proteasomal protein catabolic process                                                                           | 1.576074424 | 5.43787x10 <sup>-8</sup> |
| GO_BP        | GO:0009896~positive regulation of catabolic process                                                                        | 1.515761578 | 6.74505x10 <sup>-7</sup> |
| GO_BP        | GO:0042326~negative regulation of phosphorylation                                                                          | 1.502909247 | 7.99165x10 <sup>-7</sup> |
| GO_CC        | GO:0030123~AP-3 adaptor complex                                                                                            | 3.994358816 | 0.000368667              |
| GO_CC        | GO:0031519~PcG protein complex                                                                                             | 2.480968209 | 3.66118x10 <sup>-5</sup> |
| GO_CC        | GO:0043657~host cell                                                                                                       | 2.013962428 | 0.000336295              |
| GO_CC        | GO:0035097~histone methyltransferase complex                                                                               | 2.013962428 | 0.000336295              |
| GO_CC        | GO:0018995~host                                                                                                            | 2.013962428 | 0.000336295              |
| GO_CC        | GO:1902554~serine/threonine protein kinase complex                                                                         | 1.946830347 | 0.000168561              |
| GO_CC        | GO:1902911~protein kinase complex                                                                                          | 1.844436971 | 0.000249331              |
| GO_CC        | GO:0000151~ubiquitin ligase complex                                                                                        | 1.594669465 | 4.95234x10 <sup>-6</sup> |
| GO_CC        | GO:0061695~transferase complex, transferring phosphorus-containing groups                                                  | 1.540464291 | 7.77572x10 <sup>-5</sup> |
| GO_CC        | GO:0000790~nuclear chromatin                                                                                               | 1.493688801 | 3.69842x10 <sup>-5</sup> |
| GO_CC        | GO:0005769~early endosome                                                                                                  | 1.474253145 | 8.95858x10 <sup>-5</sup> |
| GO_CC        | GO:0005925~focal adhesion                                                                                                  | 1.404832506 | 0.000207194              |
| GO_CC        | GO:0005924~cell-substrate adherens junction                                                                                | 1.394216643 | 0.000276041              |
| GO_CC        | GO:0010008~endosome membrane                                                                                               | 1.36846165  | 0.000311401              |
| GO_CC        | GO:0044440~endosomal part                                                                                                  | 1.35581837  | 0.00026152               |
| GO_MF        | GO:0001046~core promoter sequence-specific DNA binding                                                                     | 2.191463471 | 8.28407x10 <sup>-8</sup> |
| GO_MF        | GO:0001047~core promoter binding                                                                                           | 1.959035527 | 7.06742x10 <sup>-8</sup> |
| GO_MF        | GO:0004721~phosphoprotein phosphatase activity                                                                             | 1.67982014  | 5.16219x10 <sup>-5</sup> |
| GO_MF        | GO:0003924~GTPase activity                                                                                                 | 1.610627442 | 3.45615x10 <sup>-6</sup> |
| GO_MF        | GO:0061659~ubiquitin-like protein ligase activity                                                                          | 1.593791615 | 4.26056x10 <sup>-5</sup> |
| GO_MF        | GO:0045296~cadherin binding                                                                                                | 1.578063408 | 4.94226x10 <sup>-6</sup> |
| GO_MF        | GO:0044389~ubiquitin-like protein ligase binding                                                                           | 1.568331685 | 5.05609x10 <sup>-6</sup> |
| GO_MF        | GO:0031625~ubiquitin protein ligase binding                                                                                | 1.548483158 | 1.55558x10 <sup>-5</sup> |
| GO_MF        | GO:0001228~transcriptional activator activity, RNA polymerase II transcription regulatory region sequence-specific binding | 1.506540249 | 2.60929x10 <sup>-6</sup> |
| GO_MF        | GO:0042578~phosphoric ester hydrolase activity                                                                             | 1.456548448 | 6.0699x10 <sup>-5</sup>  |
| GO_MF        | GO:0032549~ribonucleoside binding                                                                                          | 1.446218317 | 5.75654x10 <sup>-5</sup> |
| GO_MF        | GO:0050839~cell adhesion molecule binding                                                                                  | 1.433723991 | 1.50223x10 <sup>-5</sup> |
| GO_MF        | GO:0032550~purine ribonucleoside binding                                                                                   | 1.431855569 | 0.000101729              |
| GO_MF        | GO:0019787~ubiquitin-like protein transferase activity                                                                     | 1.430947689 | 1.78999x10 <sup>-5</sup> |
| GO_MF        | GO:0004842~ubiquitin-protein transferase activity                                                                          | 1.416906276 | 4.89833x10 <sup>-5</sup> |
| KEGG_Pathway | hsa05223~Non-small cell lung cancer                                                                                        | 2.443842298 | 8.53234x10 <sup>-7</sup> |
| KEGG_Pathway | hsa05214~Glioma                                                                                                            | 2.428412502 | 4.25902x10 <sup>-7</sup> |
| KEGG_Pathway | hsa05211~Renal cell carcinoma                                                                                              | 2.337588285 | 2.59082x10 <sup>-6</sup> |
| KEGG_Pathway | hsa05210~Colorectal cancer                                                                                                 | 2.263542786 | 6.16121x10 <sup>-7</sup> |
| KEGG_Pathway | hsa04933~AGE-RAGE signaling pathway in diabetic complications                                                              | 2.191031026 | 3.91409x10 <sup>-7</sup> |
| KEGG_Pathway | hsa01521~EGFR tyrosine kinase inhibitor resistance                                                                         | 2.182497312 | 6.64357x10 <sup>-6</sup> |
| KEGG_Pathway | hsa05215~Prostate cancer                                                                                                   | 2.121529645 | 1.95378x10 <sup>-6</sup> |
| KEGG_Pathway | hsa04068~FoxO signaling pathway                                                                                            | 1.980354965 | 8.79729x10 <sup>-7</sup> |

Table SII. Continued.

| Category     | Term                                                 | EnrichScore | P-value                  |
|--------------|------------------------------------------------------|-------------|--------------------------|
| KEGG_Pathway | hsa04722~Neurotrophin signaling pathway              | 1.963005172 | 4.32136x10 <sup>-6</sup> |
| KEGG_Pathway | hsa04919~Thyroid hormone signaling pathway           | 1.917878617 | 1.37947x10 <sup>-5</sup> |
| KEGG_Pathway | hsa04218~Cellular senescence                         | 1.772839046 | 1.24224x10 <sup>-5</sup> |
| KEGG_Pathway | hsa05205~Proteoglycans in cancer                     | 1.770936673 | 1.03423x10 <sup>-6</sup> |
| KEGG_Pathway | hsa04141~Protein processing in endoplasmic reticulum | 1.75282482  | 1.46388x10 <sup>-5</sup> |
| KEGG_Pathway | hsa04014~Ras signaling pathway                       | 1.702117272 | 1.41014x10 <sup>-6</sup> |
| KEGG_Pathway | hsa04010~MAPK signaling pathway                      | 1.583712647 | 4.14117x10 <sup>-6</sup> |

GO, Gene Ontology; KEGG, Kyoto Encyclopedia of Genes and Genomes; BP, biological process; CC, cellular component; MF, molecular function.

Table SIII. Functional annotation of the GO and KEGG pathway analysis of the downregulated exosomal microRNAs.

| Category     | Term                                                                               | EnrichScore | P-value                  |
|--------------|------------------------------------------------------------------------------------|-------------|--------------------------|
| GO_BP        | GO:0060368~regulation of Fc receptor mediated stimulatory signaling pathway        | 9.505605688 | 0.000322024              |
| GO_BP        | GO:0035280~miRNA loading onto RISC involved in gene silencing by miRNA             | 8.147662018 | 0.000709555              |
| GO_BP        | GO:0034135~regulation of toll-like receptor 2 signaling pathway                    | 7.921338073 | 0.000167021              |
| GO_BP        | GO:0060213~positive regulation of nuclear-transcribed mRNA poly(A) tail shortening | 6.481094787 | 0.000543706              |
| GO_BP        | GO:0060211~regulation of nuclear-transcribed mRNA poly(A) tail shortening          | 6.481094787 | 0.000543706              |
| GO_BP        | GO:0035791~platelet-derived growth factor receptor-beta signaling pathway          | 5.484003281 | 0.001345298              |
| GO_BP        | GO:0034134~toll-like receptor 2 signaling pathway                                  | 5.092288761 | 0.001972595              |
| GO_BP        | GO:0007223~Wnt signaling pathway, calcium modulating pathway                       | 3.752212771 | 0.000213971              |
| GO_BP        | GO:0061014~positive regulation of mRNA catabolic process                           | 3.376991494 | 0.001014865              |
| GO_BP        | GO:0070534~protein K63-linked ubiquitination                                       | 3.240547394 | 0.000764375              |
| GO_BP        | GO:0045739~positive regulation of DNA repair                                       | 3.033703943 | 0.001316845              |
| GO_BP        | GO:1903313~positive regulation of mRNA metabolic process                           | 2.632321575 | 0.001681368              |
| GO_BP        | GO:2001020~regulation of response to DNA damage stimulus                           | 1.933343532 | 0.001416778              |
| GO_BP        | GO:0006839~mitochondrial transport                                                 | 1.671995789 | 0.001681752              |
| GO_BP        | GO:0010256~endomembrane system organization                                        | 1.620273697 | 0.000931164              |
| GO_CC        | GO:0098826~endoplasmic reticulum tubular network membrane                          | 8.643268482 | 0.003000706              |
| GO_CC        | GO:0016442~RISC complex                                                            | 8.643268482 | 1.82167x10 <sup>-5</sup> |
| GO_CC        | GO:0031332~RNAi effector complex                                                   | 7.857516802 | 3.77133x10 <sup>-5</sup> |
| GO_CC        | GO:0070578~RISC-loading complex                                                    | 6.402421098 | 0.002194285              |
| GO_CC        | GO:0035068~micro-ribonucleoprotein complex                                         | 6.402421098 | 0.002194285              |
| GO_CC        | GO:0070822~Sin3-type complex                                                       | 4.501702335 | 0.003659919              |
| GO_CC        | GO:0000118~histone deacetylase complex                                             | 3.361271077 | 4.74245x10 <sup>-5</sup> |
| GO_CC        | GO:0010494~cytoplasmic stress granule                                              | 2.946568801 | 0.002821387              |
| GO_CC        | GO:0017053~transcriptional repressor complex                                       | 2.776953729 | 0.000162963              |
| GO_CC        | GO:0005758~mitochondrial intermembrane space                                       | 2.585593136 | 0.000868033              |
| GO_CC        | GO:0031970~organelle envelope lumen                                                | 2.512578047 | 0.000786499              |
| GO_CC        | GO:0033116~endoplasmic reticulum-Golgi intermediate compartment membrane           | 2.330292973 | 0.006825256              |
| GO_CC        | GO:1904949~ATPase complex                                                          | 2.145492177 | 0.005264245              |
| GO_CC        | GO:0005681~spliceosomal complex                                                    | 1.878971409 | 0.002106866              |
| GO_CC        | GO:0000790~nuclear chromatin                                                       | 1.525282673 | 0.007603835              |
| GO_MF        | GO:0015057~thrombin-activated receptor activity                                    | 8.437925446 | 0.003216346              |
| GO_MF        | GO:0070566~adenylyltransferase activity                                            | 4.101769314 | 0.001067008              |
| GO_MF        | GO:0035198~miRNA binding                                                           | 4.101769314 | 0.001067008              |
| GO_MF        | GO:0004435~phosphatidylinositol phospholipase C activity                           | 3.646017168 | 0.002269119              |
| GO_MF        | GO:0004629~phospholipase C activity                                                | 3.281415451 | 0.004314745              |
| GO_MF        | GO:0016409~palmitoyltransferase activity                                           | 2.960675595 | 0.004583709              |
| GO_MF        | GO:0030145~manganese ion binding                                                   | 2.757491976 | 0.002784942              |
| GO_MF        | GO:0003727~single-stranded RNA binding                                             | 2.604297977 | 0.000523409              |
| GO_MF        | GO:0003725~double-stranded RNA binding                                             | 2.556947105 | 0.002162669              |
| GO_MF        | GO:0016779~nucleotidyltransferase activity                                         | 2.378336829 | 8.54568x10 <sup>-5</sup> |
| GO_MF        | GO:0004620~phospholipase activity                                                  | 2.296034135 | 0.001436734              |
| GO_MF        | GO:0061659~ubiquitin-like protein ligase activity                                  | 1.704631403 | 0.003951937              |
| GO_MF        | GO:0003714~transcription corepressor activity                                      | 1.702720381 | 0.004667508              |
| GO_MF        | GO:0019787~ubiquitin-like protein transferase activity                             | 1.559181876 | 0.001050444              |
| GO_MF        | GO:0004842~ubiquitin-protein transferase activity                                  | 1.512519054 | 0.002965973              |
| KEGG_Pathway | hsa04710~Circadian rhythm                                                          | 3.384376215 | 0.003638013              |
| KEGG_Pathway | hsa01040~Biosynthesis of unsaturated fatty acids                                   | 3.330655957 | 0.007593651              |
| KEGG_Pathway | hsa04392~Hippo signaling pathway-multiple species                                  | 3.100955546 | 0.010882844              |
| KEGG_Pathway | hsa00062~Fatty acid elongation                                                     | 2.997590361 | 0.012857403              |
| KEGG_Pathway | hsa03410~Base excision repair                                                      | 2.725082147 | 0.020260061              |

Table III. Continued.

| Category     | Term                                              | EnrichScore | P-value     |
|--------------|---------------------------------------------------|-------------|-------------|
| KEGG_Pathway | hsa04962~Vasopressin-regulated water reabsorption | 2.725082147 | 0.007788216 |
| KEGG_Pathway | hsa00071~Fatty acid degradation                   | 2.384446878 | 0.025119712 |
| KEGG_Pathway | hsa05230~Central carbon metabolism in cancer      | 2.305838747 | 0.010316542 |
| KEGG_Pathway | hsa01212~Fatty acid metabolism                    | 2.262332348 | 0.023085505 |
| KEGG_Pathway | hsa00562~Inositol phosphate metabolism            | 2.227938782 | 0.009450481 |
| KEGG_Pathway | hsa05214~Glioma                                   | 2.110979128 | 0.018647127 |
| KEGG_Pathway | hsa04115~ p53-signaling pathway                   | 2.081659973 | 0.020412253 |
| KEGG_Pathway | hsa04137~Mitophagy-animal                         | 2.075254866 | 0.027583436 |
| KEGG_Pathway | hsa03015~mRNA surveillance pathway                | 1.976433205 | 0.017235498 |
| KEGG_Pathway | hsa05133~Pertussis                                | 1.972098922 | 0.028702765 |

GO, Gene Ontology; KEGG, Kyoto Encyclopedia of Genes and Genomes; BP, biological process; CC, cellular component; MF, molecular function.
